# Supplementary material for: Genetically predicted serum vitamin D and COVID-19: a Mendelian randomisation study
Source: HighWire-hosted journal article supplement (doi:10.1136/bmjnph-2021-000255), 2021-05-04

**Supplemental Table 1. Characteristics of SNPs included in Instrument C**

| Gene         | SNP         | EA | NEA | EAF  | BETA  | P-VAL     | F STAT | Non-vitamin<br>D GWAS<br>associations |
|--------------|-------------|----|-----|------|-------|-----------|--------|---------------------------------------|
| GC           | rs11723621  | G  | A   | 0.29 | -0.19 | 2.9E-1689 | 1467   | YES                                   |
| CYP2R1       | rs10832289  | T  | A   | 0.41 | -0.07 | 2.03E-266 | 231    | YES                                   |
| NADSYN/DHCR7 | rs12803256  | G  | A   | 0.78 | 0.10  | 1.3E-378  | 354    | YES                                   |
| CYP24A1      | rs6127099   | T  | A   | 0.28 | -0.04 | 9.30E-62  | 55     | YES                                   |
| SEC23A       | rs8018720   | C  | G   | 0.82 | -0.03 | 4.04E-36  | 30     | NO                                    |
| AMDHD1/HAL   | rs10859995  | C  | T   | 0.58 | -0.04 | 7.03E-89  | 76     | YES                                   |
| RER1         | rs6698680   | G  | A   | 0.46 | -0.01 | 8.99E-10  | 7      | YES                                   |
| PADI1        | rs3750296   | C  | G   | 0.34 | -0.02 | 2.09E-24  | 19     | NO                                    |
| RP4-657M3.2  | rs7519574   | A  | G   | 0.18 | 0.02  | 2.09E-11  | 9      | NO                                    |
| FOXO6        | rs56044892  | T  | C   | 0.21 | 0.02  | 2.85E-10  | 8      | YES                                   |
| DOCK7        | rs2934744   | A  | C   | 0.64 | -0.02 | 3.96E-26  | 23     | YES                                   |
| CELSR2       | rs7528419   | G  | A   | 0.22 | 0.02  | 2.41E-16  | 13     | YES                                   |
| ARNT         | rs3768013   | A  | G   | 0.37 | -0.01 | 1.37E-13  | 10     | YES                                   |
| FLG          | rs61816761  | A  | G   | 0.02 | 0.13  | 8.57E-74  | 71     | YES                                   |
| FDPS         | rs11264360  | A  | T   | 0.24 | 0.02  | 3.34E-15  | 12     | YES                                   |
| MARC_1       | rs867772    | G  | A   | 0.68 | -0.01 | 3.64E-11  | 8      | YES                                   |
| -NA-         | rs10127775  | T  | A   | 0.60 | 0.01  | 3.43E-09  | 7      | YES                                   |
| TDRD15       | rs12997242  | A  | G   | 0.44 | -0.01 | 2.23E-10  | 8      | YES                                   |
| GCKR         | rs11127048  | A  | G   | 0.62 | 0.02  | 6.41E-19  | 16     | YES                                   |
| NPAS2        | rs6724965   | G  | A   | 0.17 | -0.02 | 1.29E-10  | 8      | NO                                    |
| HTR5BP       | rs7569755   | A  | G   | 0.29 | 0.01  | 8.03E-11  | 8      | NO                                    |
| CPS1         | rs1047891   | A  | C   | 0.32 | -0.01 | 1.16E-11  | 9      | YES                                   |
| UGT1A4       | rs2011425   | G  | T   | 0.08 | -0.05 | 9.66E-38  | 31     | YES                                   |
| RHOA         | rs7650253   | A  | T   | 0.69 | 0.01  | 1.76E-10  | 9      | YES                                   |
| CADM2        | rs1972994   | T  | A   | 0.65 | -0.02 | 7.99E-18  | 14     | YES                                   |
| MRPL3        | rs6438900   | G  | C   | 0.26 | 0.01  | 9.59E-10  | 7      | YES                                   |
| TFDP2        | rs6773343   | T  | C   | 0.72 | 0.01  | 5.20E-09  | 6      | YES                                   |
| DOK7         | rs78649910  | A  | T   | 0.11 | -0.02 | 4.32E-09  | 7      | YES                                   |
| UGT2B7       | rs7699711   | T  | G   | 0.45 | -0.03 | 6.97E-49  | 41     | YES                                   |
| HSD17B11     | rs58073039  | G  | A   | 0.30 | -0.01 | 2.16E-11  | 8      | NO                                    |
| ADH1A        | rs28364331  | G  | A   | 0.02 | 0.06  | 1.31E-17  | 14     | YES                                   |
| TNFAIP8      | rs7718395   | G  | C   | 0.32 | 0.01  | 1.67E-09  | 7      | NO                                    |
| MED23        | rs3822868   | G  | A   | 0.84 | 0.02  | 1.41E-15  | 13     | YES                                   |
| DNAH11       | rs111529171 | C  | G   | 0.22 | -0.02 | 6.24E-11  | 8      | YES                                   |
| LINC01004    | rs1011468   | A  | G   | 0.48 | -0.01 | 1.35E-12  | 9      | YES                                   |

| Gene          | SNP         | EA | NEA | EAF  | BETA  | P-VAL     | F STAT | Non-vitamin D GWAS associations |
|---------------|-------------|----|-----|------|-------|-----------|--------|---------------------------------|
| COG5          | rs1858889   | C  | A   | 0.50 | 0.01  | 3.85E-11  | 8      | YES                             |
| GATA4         | rs804280    | A  | C   | 0.58 | 0.01  | 4.43E-11  | 8      | YES                             |
| EBF2          | rs34726834  | T  | C   | 0.25 | 0.01  | 6.65E-10  | 7      | YES                             |
| LINC00536     | rs7828742   | G  | A   | 0.60 | -0.02 | 3.06E-28  | 23     | YES                             |
| DNAH11        | rs10818769  | G  | C   | 0.86 | -0.02 | 3.35E-09  | 7      | YES                             |
| ABO           | rs532436    | A  | G   | 0.18 | -0.02 | 2.17E-09  | 7      | YES                             |
| MAT1A         | rs10887718  | T  | C   | 0.53 | -0.01 | 1.44E-10  | 8      | YES                             |
| PLEKHA7       | rs567415847 | G  | A   | 1.00 | 0.28  | 1.03E-14  | 32     | YES                             |
| TMEM151A      | rs523583    | C  | A   | 0.47 | 0.01  | 5.58E-10  | 7      | YES                             |
| RP11-21L23.4  | rs1149605   | C  | T   | 0.17 | 0.02  | 7.34E-14  | 11     | YES                             |
| ZPR1          | rs964184    | C  | G   | 0.86 | 0.04  | 5.11E-44  | 37     | YES                             |
| SLCO1B1       | rs12317268  | G  | A   | 0.15 | -0.02 | 9.15E-12  | 9      | YES                             |
| FAM166AP9     | rs9668081   | T  | C   | 0.47 | 0.01  | 5.38E-09  | 7      | YES                             |
| LIPC          | rs1800588   | T  | C   | 0.21 | -0.03 | 2.65E-36  | 30     | YES                             |
| AC007950.2    | rs17765311  | C  | A   | 0.34 | -0.02 | 1.35E-13  | 10     | YES                             |
| PEAK1         | rs62007299  | A  | G   | 0.71 | -0.01 | 1.69E-11  | 9      | YES                             |
| BCAR4         | rs8063706   | T  | A   | 0.27 | 0.01  | 3.64E-09  | 7      | NO                              |
| PDILT         | rs77924615  | A  | G   | 0.20 | -0.02 | 1.46E-10  | 8      | YES                             |
| FBXL19        | rs71383766  | T  | C   | 0.42 | 0.01  | 1.15E-09  | 8      | YES                             |
| CETP          | rs1800775   | A  | C   | 0.49 | -0.02 | 1.56E-17  | 14     | YES                             |
| RP11-120M18.2 | rs2909218   | T  | C   | 0.79 | 0.02  | 2.81E-12  | 9      | YES                             |
| DSG1          | rs8091117   | A  | C   | 0.07 | -0.02 | 1.03E-09  | 7      | NO                              |
| SERPINB11     | rs2037511   | A  | G   | 0.17 | 0.02  | 9.29E-10  | 7      | YES                             |
| STAP2         | rs57631352  | G  | A   | 0.30 | -0.01 | 1.48E-09  | 7      | YES                             |
| LDLR          | rs73015021  | G  | A   | 0.12 | 0.02  | 1.15E-14  | 11     | YES                             |
| TM6SF2        | rs58542926  | T  | C   | 0.08 | 0.03  | 8.57E-19  | 15     | YES                             |
| NPHS1         | rs3814995   | T  | C   | 0.31 | -0.01 | 2.83E-12  | 9      | NO                              |
| APOC1         | rs157595    | G  | A   | 0.61 | -0.02 | 2.95E-14  | 12     | YES                             |
| SULT2A1       | rs112285002 | T  | C   | 0.16 | 0.06  | 1.77E-110 | 98     | YES                             |
| KLK10         | rs10426     | A  | G   | 0.21 | 0.03  | 3.31E-26  | 21     | YES                             |
| ZNF808        | rs8103262   | C  | T   | 0.31 | 0.01  | 3.18E-09  | 7      | NO                              |
| NRIP1         | rs2229742   | C  | G   | 0.10 | -0.03 | 7.13E-16  | 12     | YES                             |
| PLA2G3        | rs2074735   | C  | G   | 0.06 | 0.03  | 6.55E-12  | 9      | YES                             |
| SCUBE1        | rs960596    | T  | C   | 0.34 | 0.01  | 2.23E-09  | 7      | YES                             |

BETA=beta coefficient for association with vitamin D in UKBB; P-VAL=p-value for SNP—vitamin D association in UKBB; F-stat= measure of instrument strength, calculated as described in the methods, shown for sample size of 100,000; Non-vitamin D GWAS associations = indicator of whether SNP has known genome-wide significant associations with traits other than vitamin D, identified as described in methods using LDlink webtool

Supplemental Table 2) P-values for associations of vitamin D SNPs with BMI and smoking phenotypes

| Vitamin D SNP | Locus   | BMI (continuous) <sup>a</sup> | Waist Circumference <sup>a</sup> | Obesity (case/control) <sup>a</sup> | Smoking (ever vs never) <sup>b</sup> | Smoking (former vs current) <sup>b</sup> | Smoking (cigarettes per day) <sup>b</sup> |
|---------------|---------|-------------------------------|----------------------------------|-------------------------------------|--------------------------------------|------------------------------------------|-------------------------------------------|
| rs11723621    | GC      | 0.500                         | 0.720 <sup>c</sup>               | 0.6376                              | 0.869                                | 0.645                                    | 0.751                                     |
| rs10832289    | CYP2R1  | 0.00017                       | 0.0023                           | 0.3962                              | 0.462                                | 0.701                                    | 0.165                                     |
| rs12803256    | DHCR7   | 0.590                         | 0.470                            | 0.9025                              | 0.152                                | 0.369                                    | 0.353                                     |
| rs6127099     | CYP24A1 | 0.490                         | 0.440 <sup>c</sup>               | 0.5857                              | 0.707                                | 0.302                                    | 0.517                                     |
| rs8018720     | SEC23A  | 0.390                         | 0.680                            | 0.2976                              | 0.294                                | 0.133                                    | 0.0123                                    |
| rs10859995    | AMDHD1  | 0.830                         | 0.760                            | 0.2801                              | 0.169                                | 0.17                                     | 0.517                                     |

<sup>a</sup> P-values for associations with BMI, waist circumference, and obesity accessed through MR-Base platform using the following study IDs: “ebi-a-GCST006368” (BMI) ; “ieu-a-60” (waist circumference); “finn-a-E4\_OBESITY” (obesity).

<sup>b</sup> P-values for associations with smoking phenotypes from Liu et al, 2019, (<https://www.nature.com/articles/s41588-018-0307-5>).

<sup>c</sup> Data were not available for rs11723621 and rs6127099 for the waist circumference outcome. P-values shown are for the GC and CYP24A1 SNPs identified in the SUNLIGHT Consortium (rs3755967 and rs17216707)

**Supplemental Table 3. Studies contributing to different COVID-19 outcomes in the COVID-19 Host Genetics Initiative**

| Study                                                                      | Percent of COVID-19 outcome sample |                           |                               |                         |                         |
|----------------------------------------------------------------------------|------------------------------------|---------------------------|-------------------------------|-------------------------|-------------------------|
|                                                                            | COVID vs. Population               | Hosp COVID vs. Population | Sev Resp COVID vs. Population | COVID Pos vs. COVID Neg | Hosp vs. non-hosp COVID |
| Amsterdam UMC COVID study group                                            | 0.11%                              | 0.16%                     | 0.24%                         |                         |                         |
| Ancestry                                                                   | 1.25%                              | 0.23%                     |                               | 13.57%                  | 20.32%                  |
| Genetic modifiers for COVID-19 related illness (BelCovid)                  | 0.11%                              | 0.16%                     |                               |                         |                         |
| BoSCO                                                                      |                                    | 0.04%                     | 0.05%                         |                         | 3.68%                   |
| Biobanque Quebec COVID19 (BQC19)                                           | 0.04%                              | 0.06%                     | 0.09%                         | 0.42%                   | 1.89%                   |
| Genetic determinants of COVID-19 complications in the Brazilian population | 0.17%                              | 0.25%                     | 0.33%                         |                         |                         |
| Genetics of COVID-related Manifestation (Corea)                            | 0.48%                              | 0.68%                     |                               |                         |                         |
| deCODE                                                                     | 19.82%                             | 28.30%                    |                               | 24.17%                  | 17.39%                  |
| Estonian Biobank                                                           | 9.98%                              |                           |                               | 9.64%                   |                         |
| FinnGen                                                                    | 17.19%                             | 24.62%                    | 38.00%                        |                         | 2.81%                   |
| GEN-COVID                                                                  | 0.23%                              | 0.31%                     | 0.47%                         |                         |                         |
| genomiCC                                                                   | 0.72%                              | 1.04%                     | 1.60%                         |                         |                         |
| Genomics England (genomicsengland100kcp)                                   | 4.50%                              |                           |                               | 1.43%                   |                         |
| Genes & Health (GNH)                                                       | 1.97%                              | 2.83%                     |                               | 0.29%                   | 0.94%                   |
| Helix Exome+ COVID-19 Phenotypes                                           | 0.40%                              |                           |                               |                         |                         |
| COVID19-Host(a)ge                                                          | 0.27%                              | 0.39%                     |                               |                         |                         |
| UK Blood Donors Cohort                                                     | 3.01%                              |                           |                               | 1.00%                   |                         |
| Italy COVID19-Host(a)ge                                                    |                                    |                           | 0.31%                         |                         |                         |
| Lifelines                                                                  | 1.84%                              |                           |                               | 1.26%                   |                         |
| Michigan Genomics Initiative                                               | 3.71%                              |                           |                               | 0.49%                   |                         |

| Study                                                                                                                | Percent of COVID-19 outcome sample |                           |                               |                         |                         |
|----------------------------------------------------------------------------------------------------------------------|------------------------------------|---------------------------|-------------------------------|-------------------------|-------------------------|
|                                                                                                                      | COVID vs. Population               | Hosp COVID vs. Population | Sev Resp COVID vs. Population | COVID Pos vs. COVID Neg | Hosp vs. non-hosp COVID |
| Million Veterans Program                                                                                             | 1.40%                              | 0.56%                     |                               | 32.96%                  | 29.69%                  |
| Netherlands Twin Register                                                                                            | 0.39%                              |                           |                               | 0.20%                   |                         |
| Partners Healthcare Biobank                                                                                          | 2.53%                              |                           |                               | 3.16%                   |                         |
| Penn Medicine Biobank                                                                                                | 0.62%                              | 0.89%                     |                               | 0.86%                   | 1.52%                   |
| Qatar Genome Program                                                                                                 | 1.01%                              | 1.38%                     |                               |                         | 6.42%                   |
| Spain COVID19-Host(a)ge                                                                                              |                                    |                           | 0.20%                         |                         |                         |
| Determining the Molecular Pathways and Genetic Predisposition of the Acute Inflammatory Process Caused by SARS-CoV-2 | 0.05%                              | 0.06%                     | 0.06%                         |                         | 3.32%                   |
| Genomic epidemiology of SARS-Cov-2 and host genetics in Coronavirus Disease 2019 (COVID-19)                          | 0.02%                              |                           |                               |                         |                         |
| The genetic predisposition to severe COVID-19                                                                        | 0.28%                              | 0.40%                     | 0.61%                         |                         |                         |
| UK Biobank                                                                                                           | 27.87%                             | 37.65%                    | 58.05%                        | 12.28%                  | 12.01%                  |

**Supplemental Table 4. Minimum detectable odds ratios for COVID-19 outcomes**

| COVID-19 outcome             | N cases | N controls | Case prevalence | Min detectable Odds Ratio* |
|------------------------------|---------|------------|-----------------|----------------------------|
| COVID vs population          | 17,965  | 1,370,547  | 0.013           | 0.88                       |
| Hosp COVID vs pop            | 7,885   | 961,804    | 0.008           | 0.82                       |
| Severe resp COVID vs pop     | 4,336   | 623,902    | 0.007           | 0.73                       |
| COVID pos vs COVID neg       | 110,85  | 116,794    | 0.087           | 0.84                       |
| Hosp COVID vs non-hosp COVID | 2,430   | 8,478      | 0.223           | 0.66                       |

\*Minimum detectable odds ratios for 80% power, represents odds ratio per SD increase in serum vitamin D, assumes 3% variance in vitamin D explained by genetic instruments

Supplemental Table 5. Multivariable MR estimates for direct effect of vitamin D on COVID-19 outcome conditioning on BMI

| MR method | Conditioning GWAS |          | COVID vs. population |           | Hosp COVID vs. population |           | Severe Resp COVID vs. population |           | COVID pos vs. COVID neg |           | Hosp COVID vs. non-hosp COVID |           |
|-----------|-------------------|----------|----------------------|-----------|---------------------------|-----------|----------------------------------|-----------|-------------------------|-----------|-------------------------------|-----------|
|           | Study ID          | Ancestry | OR                   | 95% CI    | OR                        | 95% CI    | OR                               | 95% CI    | OR                      | 95% CI    | OR                            | 95% CI    |
| MVMR      | ebi-a-GCST006368  | European | 1.04                 | 0.93-1.17 | 1.14                      | 0.96-1.35 | 1.01                             | 0.79-1.31 | 1.13                    | 0.97-1.32 | 1.36                          | 0.90-2.06 |
| MVMR      | ieu-a-835         | European | 1.04                 | 0.91-1.18 | 1.15                      | 0.93-1.43 | 0.99                             | 0.74-1.33 | 1.14                    | 0.97-1.33 | 1.46                          | 0.92-2.30 |
| MVMR      | ieu-a-2           | Mixed    | 1.04                 | 0.92-1.16 | 1.15                      | 0.95-1.39 | 1.00                             | 0.76-1.30 | 1.14                    | 0.96-1.34 | 1.48                          | 1.01-2.16 |

OR, odds ratios per unit increase in serum vitamin D in natural log scale; 95% CI, 95% confidence interval

Supplemental Table 6. MR analysis limiting instrument to SNPs with no known associations except with vitamin D

| MR method               | COVID vs. population |           | Hosp COVID vs. population |           | Severe Resp COVID vs. population |           | COVID pos vs. COVID neg |           | Hosp COVID vs. non-hosp COVID |           |
|-------------------------|----------------------|-----------|---------------------------|-----------|----------------------------------|-----------|-------------------------|-----------|-------------------------------|-----------|
|                         | OR                   | 95% CI    | OR                        | 95% CI    | OR                               | 95% CI    | OR                      | 95% CI    | OR                            | 95% CI    |
| IVW                     | 0.94                 | 0.55-1.62 | 0.92                      | 0.34-2.50 | 0.92                             | 0.27-3.15 | 0.96                    | 0.51-1.80 | 0.60                          | 0.12-2.98 |
| MR-Egger intercept test | p-value = 0.32       |           | p-value = 0.62            |           | p-value = 0.89                   |           | p-value = 0.17          |           | p-value = 0.92                |           |

OR, odds ratios per SD increase in log-transformed serum vitamin D; 95% CI, 95% confidence interval;

SNPs included in instrument: rs3750296, rs3814995, rs58073039, rs6724965, rs7519574, rs8103262, rs7569755, rs7718395, rs8018720, rs8063706, rs8091117

**Supplemental Table 7. Replication of MR estimates of effect of vitamin D on COVID-19 outcomes using SNP-vitamin D association data from SUNLIGHT Consortia**

| MR method               | COVID vs. population |           | Hosp COVID vs. population |           | Severe Resp COVID vs. population |           | COVID pos vs. COVID neg |           | Hosp COVID vs. non-hosp COVID |           |
|-------------------------|----------------------|-----------|---------------------------|-----------|----------------------------------|-----------|-------------------------|-----------|-------------------------------|-----------|
|                         | OR                   | 95% CI    | OR                        | 95% CI    | OR                               | 95% CI    | OR                      | 95% CI    | OR                            | 95% CI    |
| Instrument A            |                      |           |                           |           |                                  |           |                         |           |                               |           |
| IVW                     | 1.04                 | 0.79-1.35 | 1.04                      | 0.67-1.62 | 0.72                             | 0.40-1.29 | 1.16                    | 0.77-1.75 | 2.39                          | 0.93-6.13 |
| MR-Egger intercept test | p-value = 0.90       |           | p-value = 0.91            |           | p-value = 0.40                   |           | p-value = 0.26          |           | p-value = 0.13                |           |

OR, odds ratios per unit increase in serum vitamin D in natural log scale; 95% CI, 95% confidence interval



Supplemental Figure 1) Genetic Loci integral to the vitamin D metabolic pathway

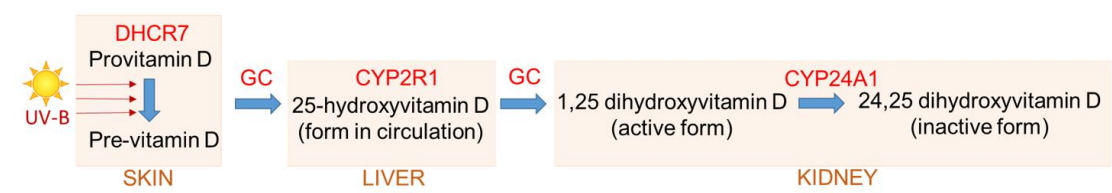

## Supplemental Figure 2) MR scatter and MR forest plots for COVID-19 outcomes

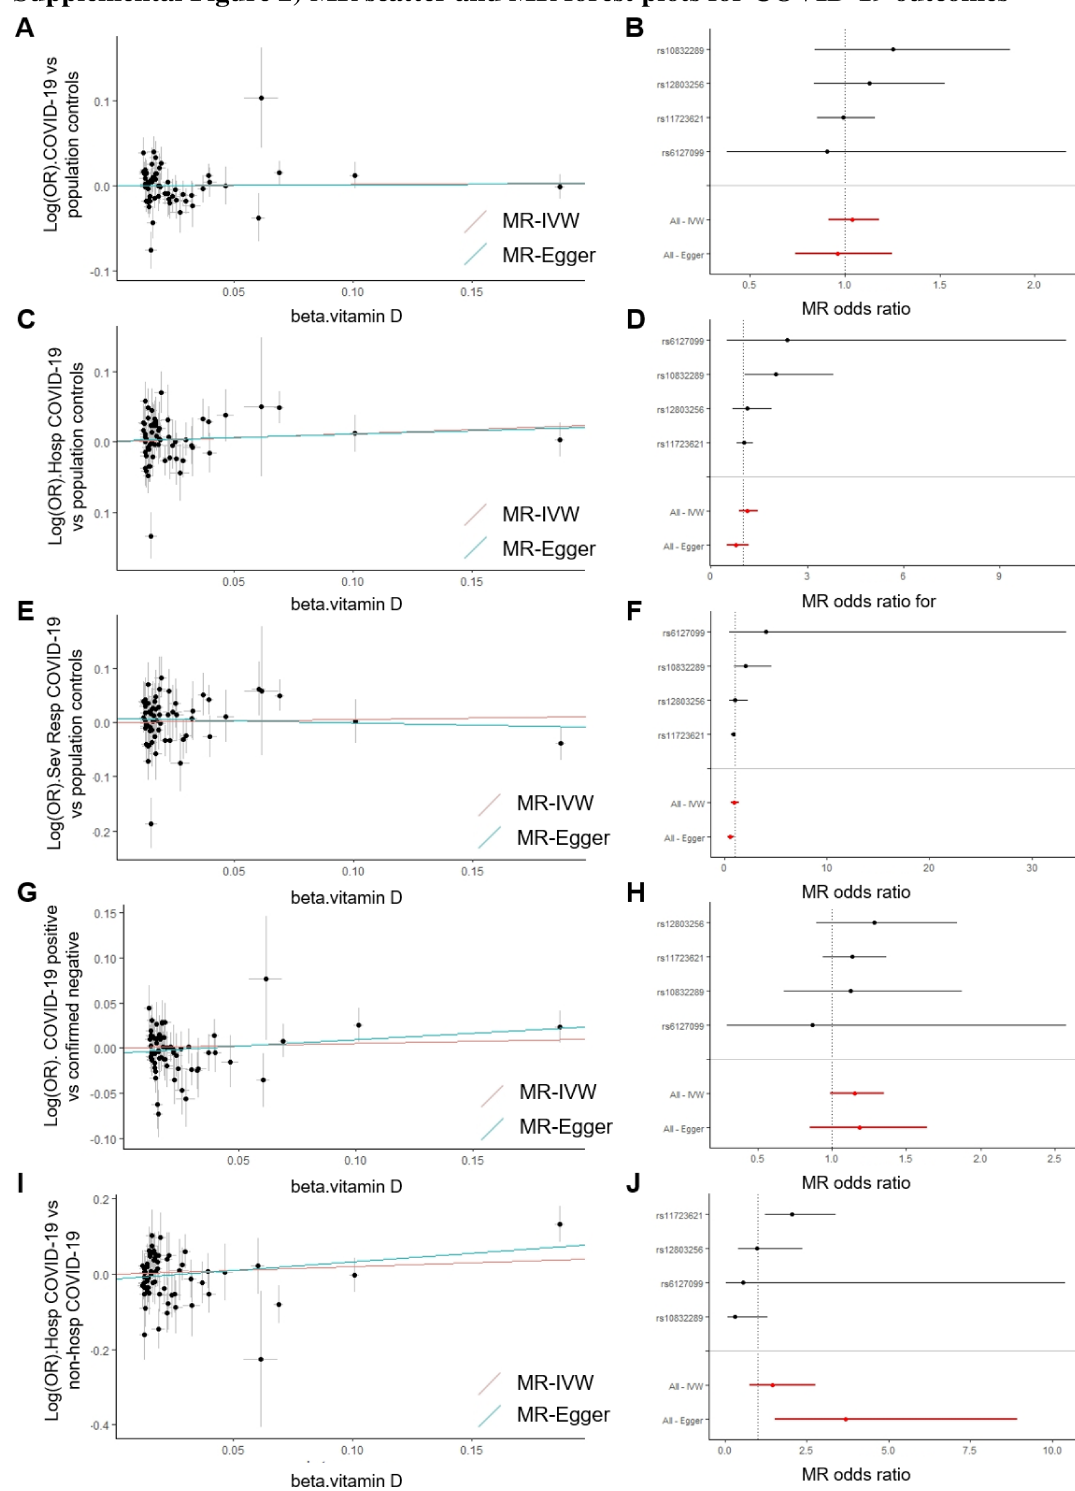

*Supplemental Figure 2 caption: MR scatter and forest plots for (A-B) COVID-19 vs population controls, (C-D) Hospitalized COVID-19 vs population controls, (E-F) Severe respiratory COVID-19 vs population controls, (G-H) COVID-19 vs confirmed negative and (I-J) hospitalized COVID-19 vs non-hospitalized COVID-19. Scatter plots show the SNP—vitamin D associations on the x-axis vs the SNP—log(OR) for COVID-19 case vs comparator on the y axis for all SNPs considered in instruments A,B and C. The MR estimates generated from the IVW (red slope) and MR-Egger (teal slope) MR methods are overlaid. The forest plots show the MR estimates (odds ratios and 95% confidence intervals) generated from instrument A for the effect of 1 SD higher serum vitamin D on risk of COVID-19 case vs comparator. Estimates for each SNP are shown separately (black bars), as well as summarized estimates across all SNPs (red bars).*

**Supplemental Figure 3) Inverse variance weighted MR estimates of effect of vitamin D on risk of COVID-19 infection and hospitalization in European ancestry participants**

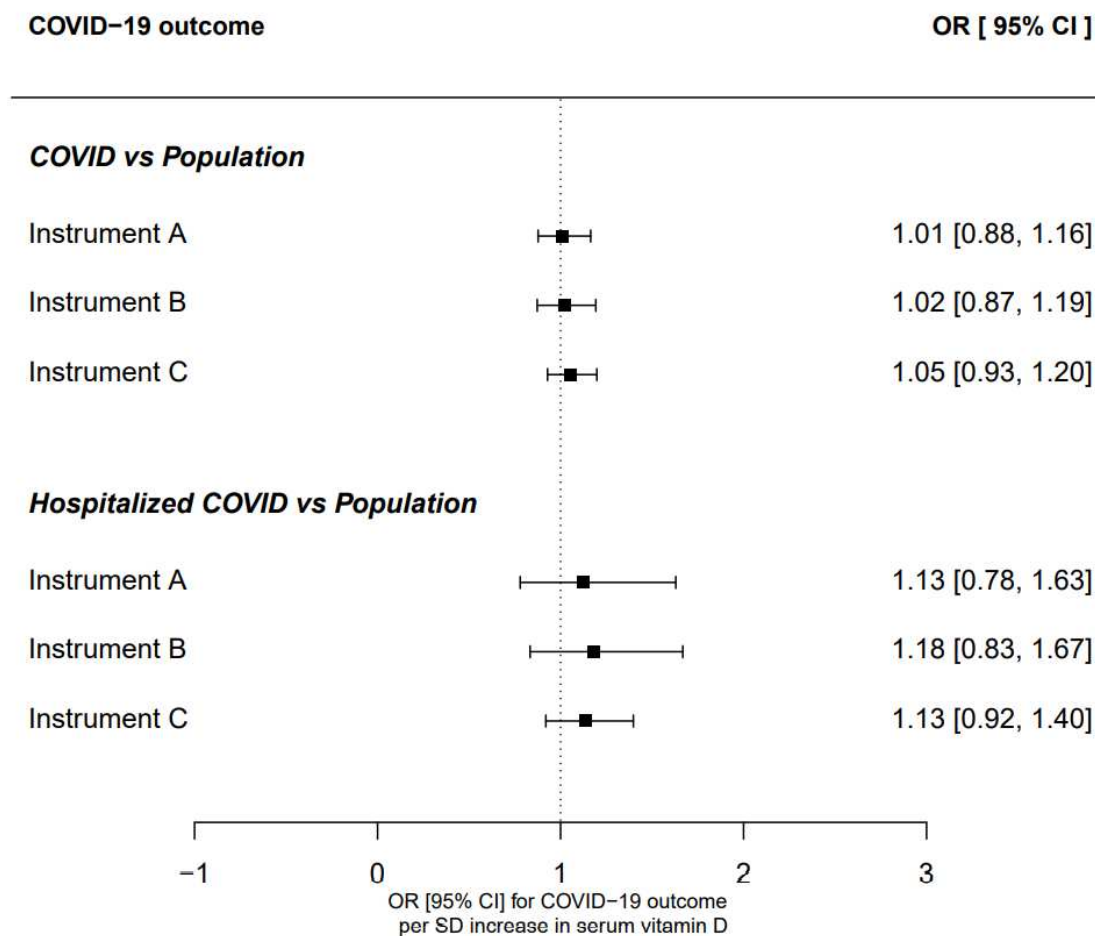

**Supplemental Figure 4) MR estimates of effect of vitamin D on COVID-19 outcomes using different MR Methods for instrument A**

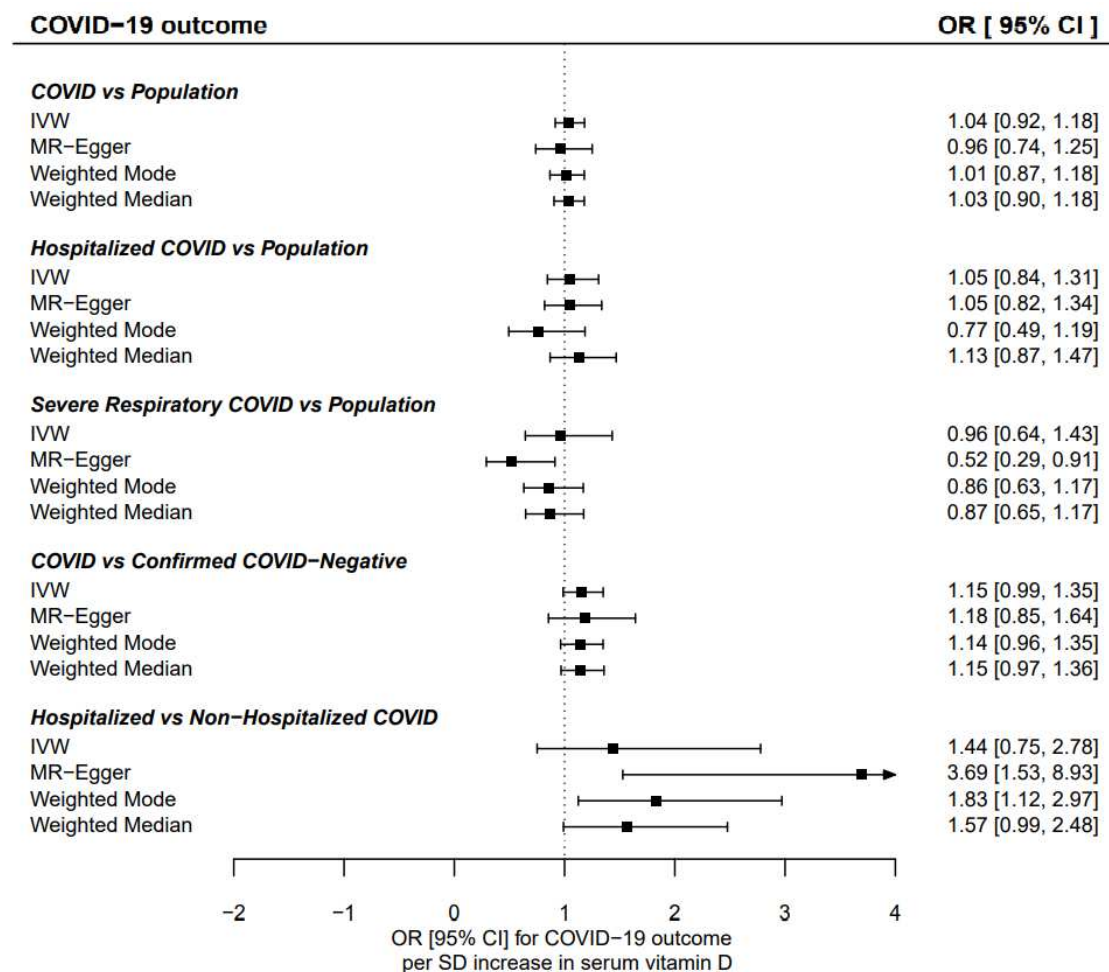

**Supplemental Figure 5) Pairwise correlations of beta-coefficients observed for SNP-vitamin D associations stratified by COVID-19 risk subgroup, across all SNPs in instruments A, B and C**

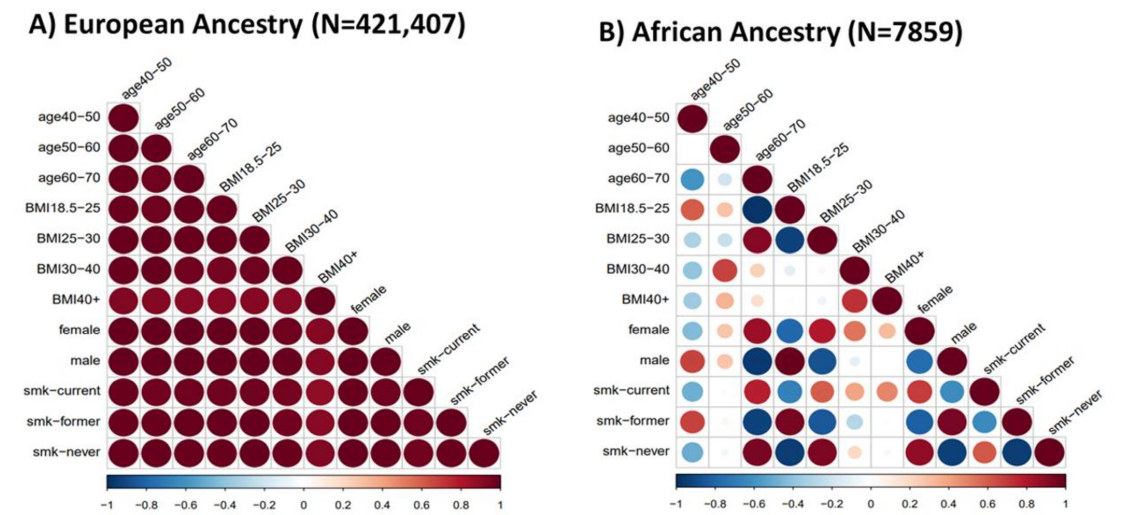

Supplement: bmjnph-2021-000255supp001_data_supplement.pdf [file bmjnph-2021-000255supp001_data_supplement.pdf]
